# Supplementary material for: Synovial Sarcoma of the Head and Neck: A Single Institution Review
Source: Hindawi journal article supplement (doi:10.1155/2017/2016752), 2017-01-01
Supplement: f1 [file 2016752.f1.pdf]

## Synovial sarcoma of the head and neck: a single institution review

Vancheswaran Gopalakrishnan,<sup>1</sup> Behrang Amini,<sup>2</sup> Michael J Wagner,<sup>3</sup> Erica N. Nowell,<sup>4</sup> Alexander Lazar,<sup>5</sup> Patrick P. Lin,<sup>6</sup> Robert S. Benjamin,<sup>4</sup> and Dejka M. Araujo<sup>4</sup>

### Supplemental materials

**Supplemental table S1: Median progression-free and overall survival based on timing of radiation or chemotherapy**

|                                | Median PFS<br>(in yrs) | Log-rank p | Median OS<br>(in yrs) | Log-rank p |
|--------------------------------|------------------------|------------|-----------------------|------------|
| <b>Radiation (n=36)</b>        |                        | 0.331      |                       | 0.072      |
| Adjuvant<br>(n=30)             | 5.41                   |            | 7.9                   |            |
| Neoadjuvant<br>(n=5)           | NA                     |            | NA                    |            |
| Peri-operative<br>(n=1)        | 2.23                   |            | 4.26                  |            |
| <b>Chemotherapy<br/>(n=26)</b> |                        | 0.87       |                       | 0.118      |
| Neoadjuvant<br>(n=13)          | 3.95                   |            | 4.52                  |            |
| Adjuvant<br>(n=13)             | 4.58                   |            | NA                    |            |

**Supplemental table S2: Overall survival by choice of therapeutic regimen after recurrence**

|                                                | N (%)                 | Median OS <sup>#</sup><br>(in years) | Log-rank p |
|------------------------------------------------|-----------------------|--------------------------------------|------------|
| Local therapy only                             | 5 (0.25) <sup>a</sup> | 3.4                                  | 0.643      |
| Local therapy + Additional<br>systemic therapy | 9 (0.45) <sup>b</sup> | 2.47                                 |            |
| Systemic therapy only                          | 5 (0.25)              | 2.33                                 |            |

<sup>a</sup>: 3 patients underwent surgery, 2 underwent surgery plus local radiation therapy

<sup>b</sup>: 8 patients got surgery + adjuvant chemotherapy. 1 patient got surgery + radiation + adjuvant chemotherapy

# OS was calculated as the interval between date of diagnosis of recurrent disease to date of death or last contact
